# Supplementary material
Source: PubMed Central journal article supplement (PMC2752579)
Supplement: 0908492106_0908492106SI.pdf [file 0908492106_0908492106SI.pdf]

# Supporting Information

Andrade et al. 10.1073/pnas.0908492106

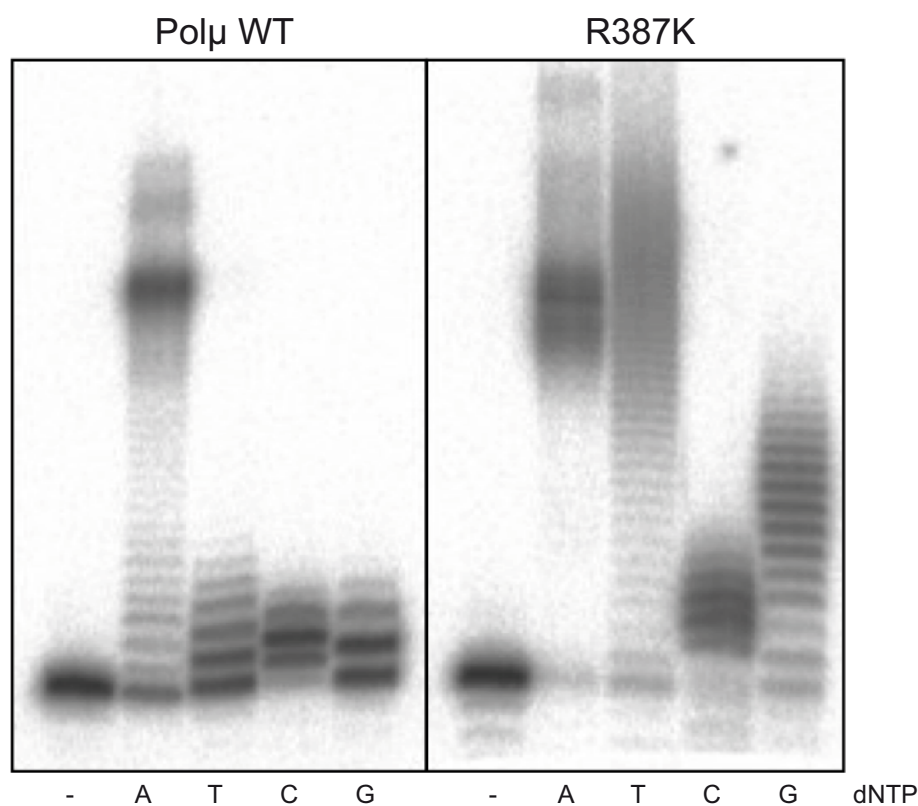

**Fig. S1.** Mutant R387K has a stronger terminal transferase with any of the four dNTPs. Terminal transferase reaction was carried out using 5 nM of a labeled homopolymer (PolydT) as DNA primer, 1 mM  $MnCl_2$ , 100  $\mu M$  of the indicated dNTP, and 600 nM of either Pol $\mu$  wt or mutant R387K. After incubation for 30 min at 30 °C, extension of the 5'-labeled polydT was analyzed by 8 M urea-20% PAGE and autoradiography.

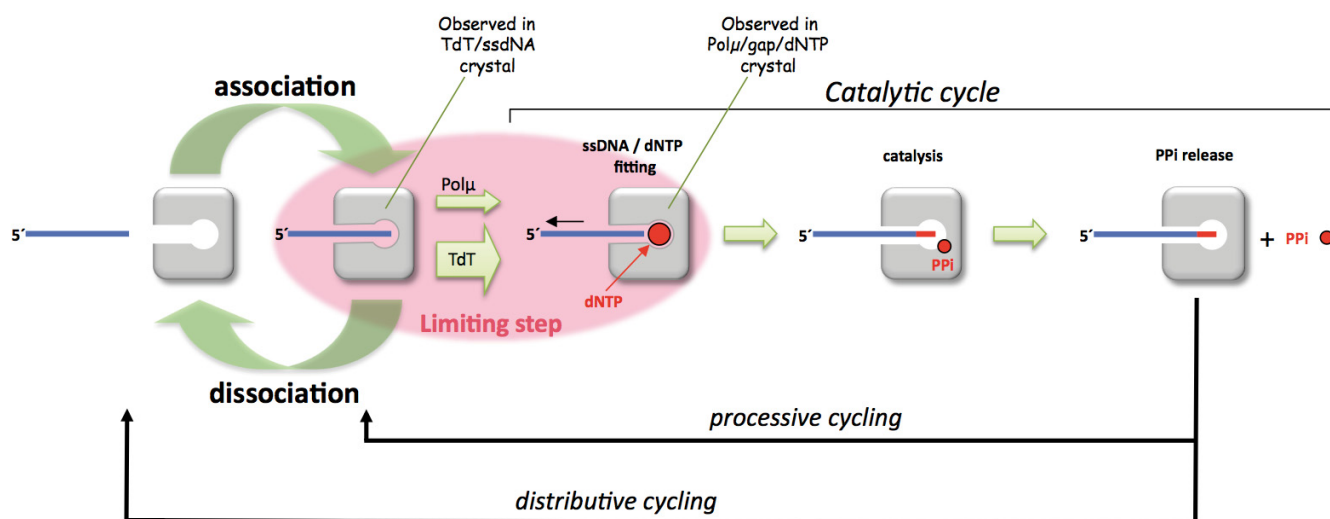

**Fig. S2.** Limiting step for terminal transferase addition of nucleotides. Untemplated terminal transferase addition of nucleotides on ssDNA requires several steps: 1) Formation of a binary complex between the enzyme and ssDNA. Upon association, that binary complex is stable but unproductive, according to TdT structural information. 2) To obtain a catalytically competent ternary complex, relocation of the primer terminus has to occur, driven by the incoming nucleotide, but in the absence of a templating base. That conformational change imposes a rate-limiting step for untemplated addition of nucleotides, that restricts terminal transferase capacity to specialized enzymes as TdT and Pol $\mu$ . According to our data, the different terminal transferase efficiency of these two enzymes depends on their intrinsic capacity to overcome this rate-limiting step. 3) Further steps in the catalytic cycle will include catalysis and PPi release. Reiterative synthesis, either being distributive or processive, will always face that rate-limiting step to achieve enzyme/ssDNA/dNTP fitting.

A

Polμ WT

TdT

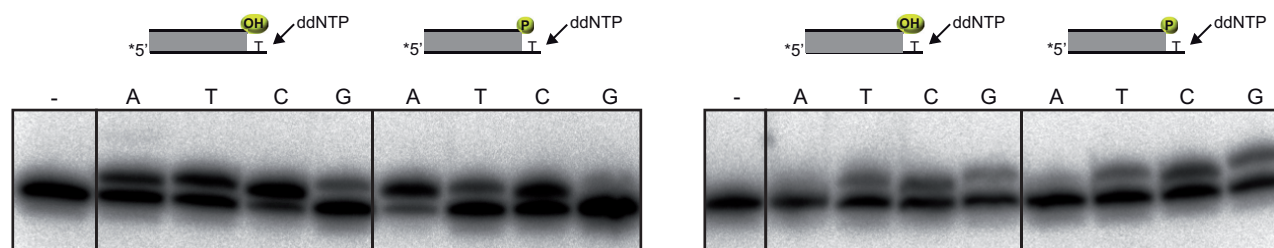

# B

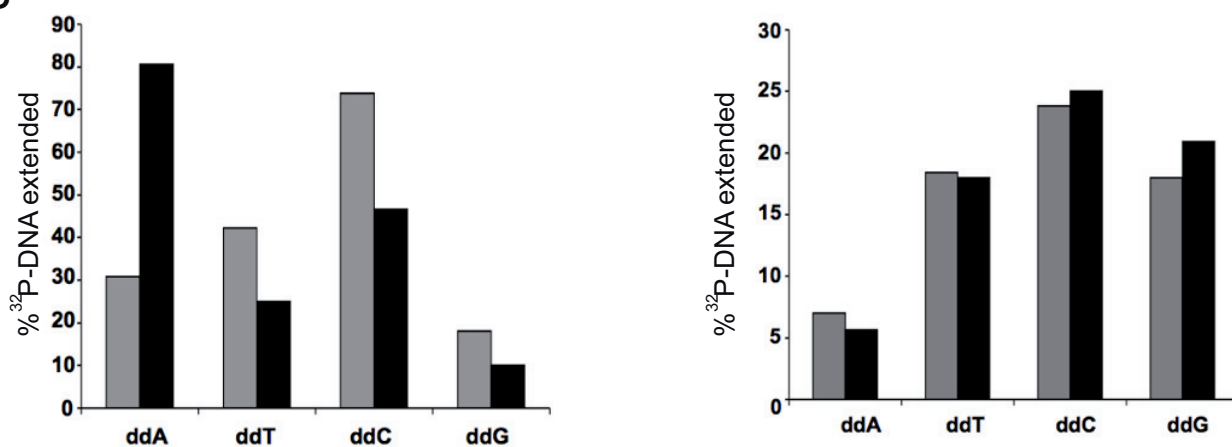

**Fig. S3.** Importance of the 5'-P group for the terminal transferase of Pol $\mu$  versus TdT. (A) The assay was performed as described in *Materials and Methods*, using a 3'-protruding (1T) dsDNA substrate (200 nM), with or without a recessive 5'P, as indicated, in the presence of 1 mM MnCl<sub>2</sub>, 100  $\mu$ M of the indicated ddNTP, and 200 nM of either Pol $\mu$  wt or TdT. After incubation for 30 min at 30  $^{\circ}$ C, the + 1 extension of the 5'-labeled oligonucleotide was analyzed by 8 M urea-20% PAGE and autoradiography. (B) Quantification of the + 1 extension catalyzed by Pol $\mu$  (left diagram) and TdT (right diagram) on 3'-protruding substrates containing (black bars) or lacking (gray bars) a 5'-P group.

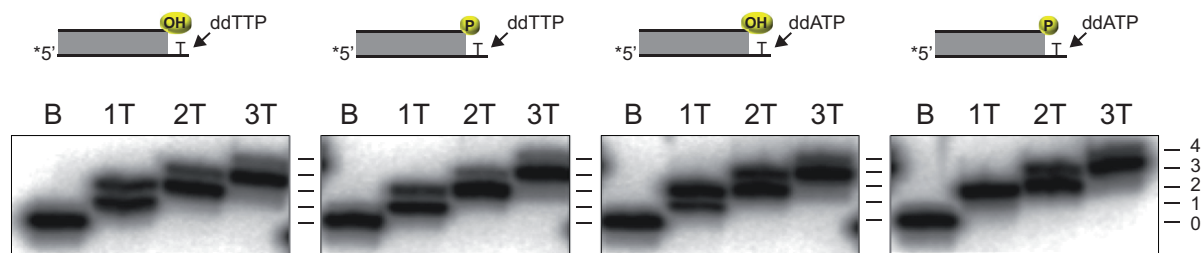

**Fig. S4.** Switching from terminal transferase to NHEJ mode, dependent on the presence of a 5'P group only occurs with 1nt protruding substrates. The assay was performed as described in *Materials and Methods*, using either blunt or 3'-protruding (1T, 2T, and 3T) dsDNA substrates (200 nM), with or without a recessive 5'P, as indicated, in the presence of 1 mM  $\text{MnCl}_2$ , 100  $\mu\text{M}$  of the indicated ddNTP, and 200 nM of  $\text{Pol}\mu$  wt. After incubation for 30 min at 30 °C, the + 1 extension of the 5'P- labeled oligonucleotide was analyzed by 8 M urea-20% PAGE and autoradiography.
